# Supplementary material for: Bold Frogs or Shy Toads? How Did the COVID-19 Closure of Zoological Organisations Affect Amphibian Activity?
Source: MDPI journal article supplement (doi:10.3390/ani11071982), 2021-07-02
Supplement: s1 [file s1]

Supplementary Table S1: Median temperature ( $\pm$  SD) for each enclosure during the study period.

| Enclosure | Month     | Median temperature °C |
|-----------|-----------|-----------------------|
| Native    | March     | 18.35 $\pm$ 0.652     |
|           | April     | 19.1 $\pm$ 1.118      |
|           | May       | 20.05 $\pm$ 1.146     |
|           | June      | 22.4 $\pm$ 1.772      |
|           | August    | 23.65 $\pm$ 1.722     |
|           | September | 21.8 $\pm$ 1.231      |
| Pool frog | March     | 19.45 $\pm$ 0.582     |
|           | April     | 19.9 $\pm$ 1.316      |
|           | May       | 21.2 $\pm$ 1.075      |
|           | June      | 23.9 $\pm$ 1.963      |
|           | August    | 24.95 $\pm$ 1.683     |
|           | September | 22.3 $\pm$ 1.201      |
| Mantella  | March     | 19.65 $\pm$ 1.518     |
|           | April     | 19.9 $\pm$ 0.958      |
|           | May       | 20.7 $\pm$ 1.179      |
|           | June      | 23.7 $\pm$ 1.491      |
|           | August    | 24.65 $\pm$ 1.653     |
|           | September | 23.2 $\pm$ 1.113      |
| Dart frog | March     | 20.35 $\pm$ 0.864     |
|           | April     | 22 $\pm$ 0.744        |
|           | May       | 22.7 $\pm$ 1.085      |
|           | June      | 25.2 $\pm$ 1.134      |
|           | August    | 25.2 $\pm$ 1.126      |
|           | September | 24.4 $\pm$ 0.728      |
